# Supplementary material for: Acetyl-CoA carboxylase 1–dependent lipogenesis promotes autophagy downstream of AMPK
Source: PubMed Central journal article supplement (PMC6690696; doi:10.1074/jbc.ra118.007020), 2019-06-17
Supplement: supp_RA118.007020_142392_1_supp_348205_pt8vbk.pdf [file supp_RA118.007020_142392_1_supp_348205_pt8vbk.pdf]

# Supporting Information

to

## Acetyl-CoA carboxylase 1-dependent lipogenesis promotes autophagy downstream of AMPK

Angelina S. Gross<sup>1,\*</sup>, Andreas Zimmermann<sup>1,2,\*</sup>, Tobias Pendl<sup>1,\*</sup>, Sabrina Schroeder<sup>1,3</sup>, Hannes Schoenlechner<sup>1</sup>, Oskar Knittelfelder<sup>4</sup>, Laura Lamplmayr<sup>1</sup>, Ana Santiso<sup>1</sup>, Andreas Aufschneider<sup>1,5</sup>, Daniel Waltenstorfer<sup>1</sup>, Sandra Ortonobes Lara<sup>1</sup>, Sarah Stryeck<sup>6</sup>, Christina Kast<sup>1</sup>, Christoph Ruckenstuhl<sup>1</sup>, Sebastian J. Hofer<sup>1,3</sup>, Birgit Michelitsch<sup>1,7</sup>, Martina Woelflingseder<sup>1</sup>, Rolf Müller<sup>8</sup>, Didac Carmona-Gutierrez<sup>1</sup>, Tobias Madl<sup>3,6</sup>, Sabrina Büttner<sup>1,5</sup>, Kai-Uwe Fröhlich<sup>1</sup>, Andrej Shevchenko<sup>4</sup>, Tobias Eisenberg<sup>1,2,3,#</sup>

<sup>1</sup>Institute of Molecular Biosciences, NAWI Graz, University of Graz, Graz, Austria.

<sup>2</sup>Central Lab Gracia, NAWI Graz, University of Graz, Graz, Austria.

<sup>3</sup>BioTechMed-Graz, Graz, Austria.

<sup>4</sup>Max Planck Institute of Molecular Cell Biology and Genetics, Dresden, Germany.

<sup>5</sup>Department of Molecular Biosciences, The Wenner-Gren Institute, Stockholm University, Stockholm, Sweden.

<sup>6</sup>Gottfried Schatz Research Center for Cell Signaling, Metabolism and Aging, Institute of Molecular Biology & Biochemistry, Medical University of Graz, Graz, Austria.

<sup>7</sup>Division of Plastic, Aesthetic and Reconstructive Surgery, Department of Surgery, Medical University of Graz, Graz, Austria

<sup>8</sup>Helmholtz Institute for Pharmaceutical Research Saarland, Saarbrücken, Germany.

\*these authors contributed equally to this work

#correspondence to: tobias.eisenberg@uni-graz.at

### Content:

**Supplemental Table S1 and S2**

**Supplemental Figures 1-7**

## Supplemental Table S1

*S. cerevisiae* yeast strains used in this study. For details on construction of strains refer to the Experimental Procedures

| Yeast Strain                                               | Genotype                                                                                   | Origin                  | Alias |
|------------------------------------------------------------|--------------------------------------------------------------------------------------------|-------------------------|-------|
| BY4741                                                     | <i>MATa his3Δ-1 leu2Δ-0 met15Δ-0 ura3Δ-0</i>                                               | Euroscarf               |       |
| Δ <i>vps30</i> (Δ <i>atg6</i> )                            | BY4741 <i>vps30::kanMX</i>                                                                 | Euroscarf               |       |
| Δ <i>atg7</i>                                              | BY4741 <i>atg7::kanMX</i>                                                                  | Euroscarf               |       |
| Δ <i>atg7</i> Δ <i>pep4</i>                                | BY4741 <i>atg7::kanMX pep4::HIS3</i>                                                       | This study              | TEY30 |
| Δ <i>pep4</i>                                              | BY4741 <i>pep4::HIS3</i>                                                                   | This study              | TEY31 |
| Δ <i>pep4</i> 3HA- <i>Atg8</i>                             | BY4741 <i>pep4::HIS3 pATG8:natNT2-pMet25-3xHA-Atg8</i>                                     | This study              | TEY32 |
| Δ <i>atg7</i> Δ <i>pep4</i> 3HA- <i>Atg8</i>               | BY4741 <i>atg7::kanMX pep4::HIS3 pATG8:natNT2-pMet25-3xHA-Atg8</i>                         | This study              | TEY33 |
| BY4741 <i>p8</i> <sup>1</sup>                              | BY4741 <i>pATG8:natNT2-pATG8-EGFP-Atg8</i>                                                 | (32)                    | TEY34 |
| <i>acc1</i> <sup>S/A</sup> <i>Mat α</i>                    | BY4742 ( <i>his3Δ-1 leu2Δ-0 lys2Δ-0 ura3Δ-0</i> ) <i>acc1</i> <sup>Ser1157/Ala</sup>       | (25)                    |       |
| <i>acc1</i> <sup>S/A</sup>                                 | BY4741 <i>acc1</i> <sup>Ser1157/Ala</sup>                                                  | This study <sup>2</sup> | TEY35 |
| <i>acc1</i> <sup>S/A</sup> <i>p8</i>                       | BY4741 <i>acc1</i> <sup>Ser1157/Ala</sup> <i>pATG8:natNT2-pATG8-EGFP-Atg8</i>              | This study              | TEY36 |
| Δ <i>snf1</i> <i>p8</i>                                    | BY4741 <i>snf1::hphNT1 pATG8:natNT2-pATG8-EGFP-Atg8</i>                                    | This study              | TEY37 |
| Δ <i>snf1</i> <i>acc1</i> <sup>Ser1157/Ala</sup> <i>p8</i> | BY4741 <i>acc1</i> <sup>Ser1157/Ala</sup> <i>snf1::hphNT1 pATG8:natNT2-pATG8-EGFP-Atg8</i> | This study              | TEY38 |
| BY4741 <i>Atg7-6HA</i>                                     | BY4741 <i>Atg7-6HA-hphNT1</i>                                                              | (32)                    | TEY39 |
| <i>acc1</i> <sup>S/A</sup> <i>Atg7-6HA</i>                 | BY4741 <i>acc1</i> <sup>Ser1157/Ala</sup> <i>Atg7-6HA-hphNT1</i>                           | This study              | TEY40 |
| BY4741 <i>Pho8ΔN60</i>                                     | BY4741 <i>PHO8-URA3-pho8ΔN60</i>                                                           | (32)                    | TEY41 |
| <i>acc1</i> <sup>S/A</sup> <i>Pho8ΔN60</i>                 | BY4741 <i>acc1</i> <sup>Ser1157/Ala</sup> <i>PHO8-URA3-pho8ΔN60</i>                        | This study              | TEY42 |
| BY4741 <i>pCUP1-EGFP-Atg8</i>                              | BY4741 <i>pATG8:natNT2-pCUP1-EGFP-Atg8</i>                                                 | This study              | TEY43 |
| <i>acc1</i> <sup>S/A</sup> <i>pCUP1-EGFP-Atg8</i>          | BY4741 <i>acc1</i> <sup>Ser1157/Ala</sup> <i>pATG8:natNT2-pCUP1-EGFP-Atg8</i>              | This study              | TEY44 |
| BY4741 <i>p8 Vph1-mCherry</i>                              | BY4741 <i>pATG8:natNT2-pATG8-EGFP-ATG8 Vph1-3mCherry-hphNT1</i>                            | (49)                    |       |
| Δ <i>atg15</i> <i>p8 Vph1-mCherry</i>                      | BY4741 <i>atg15::kanMX pATG8:natNT2-pATG8-EGFP-ATG8 Vph1-3mCherry-hphNT1</i>               | This study(49)          | TEY45 |

<sup>1</sup>*p8* designates strains expressing N-terminally EGFP-tagged Atg8 (EGFP-Atg8) under control of its endogenous promoter (32).

<sup>2</sup>Obtained by crossing *acc1*<sup>S/A</sup> *Mat α* (provided by SD Kohlwein) with the BY4741 wild type and subsequent tetrad dissection (see *Methods*).

## Supplemental Table S2

PCR primers and templates used for generation of cassettes for mutant generation by gene replacement or tagging by homologous recombination.

| Target                               | Primers                                                                                                                                                       | PCR template (Reference) |
|--------------------------------------|---------------------------------------------------------------------------------------------------------------------------------------------------------------|--------------------------|
| <i>ATG15</i> deletion                | 5'-AACTGATCTAGGCATTACAATTAAGGAAACAAGGGAAATATTCTATTGACAGCTGAAGCTTCGTACGC-3'<br>5'-GGGCGCATAGGCCCTAAAACAACACTAGGGTCATAATAGATGTATGGGTGCGCATAGGCCACTAGTGGATCTG-3' | pUG6 (35)                |
| Control PCR of <i>ATG15</i> deletion | 5'-CATAGGCTGGGCCATATAC-3'<br>5'-CTGCAGCGAGGAGCCGTAAT-3'                                                                                                       |                          |
| <i>SNF1</i> deletion                 | 5'-TTTTTTTTGTAAACAAGTTTTGCTACACTCCCTTAATAAAGTCAACCGTACGCTGCAGGTGCGAC-3'<br>5'-CATAAAAAAAGGGAAGTCCATATCATTCTTTTACGTTCCACCATCAATCGATGAATTCGAGCTCG-3'            | pFA-hphNT1 (34)          |
| Control PCR of <i>SNF1</i> deletion  | 5'-CGTGATGATGGGACTCGA-3'<br>5'-GTCGACCTGCAGCGTACG-3'                                                                                                          |                          |
| <i>PEP4</i> deletion                 | 5'-TCTAGATGGCAGAAAAGGATAGGGCGGAGAAGTAAGAAAAGTTTAGCGCATAGGCCACTAGTGGATCTG-3'<br>5'-ATTTAATCCAAATAAAATTCAAACAAAAACAAAATAACCAGCTGAAGCTTCGTACGC-3'                | pUG27 (35)               |
| Control PCR of <i>PEP4</i> deletion  | 5'-GCTTGATGTGGTACAACAAG-3'<br>5'-CTGCAGCGAGGAGCCGTAAT-3'                                                                                                      |                          |
| 3HA-tagging of Atg8                  | 5'-CTAATAATTGTAAAGTTGAGAAAATCATAATAAAAATAATTACTA-3'<br>5'-GACTCCGCCTTCCTTTTTTCAAATGGATATTCAGACTTAAATGTA-3'                                                    | pYM-N36 (34)             |
| Control PCR of 3HA-tagging of Atg8   | 5'-AGAGAGCTGGTCAACAGAATCC-3'<br>5'-GTCGACCTGCAGCGTACG-3'                                                                                                      |                          |

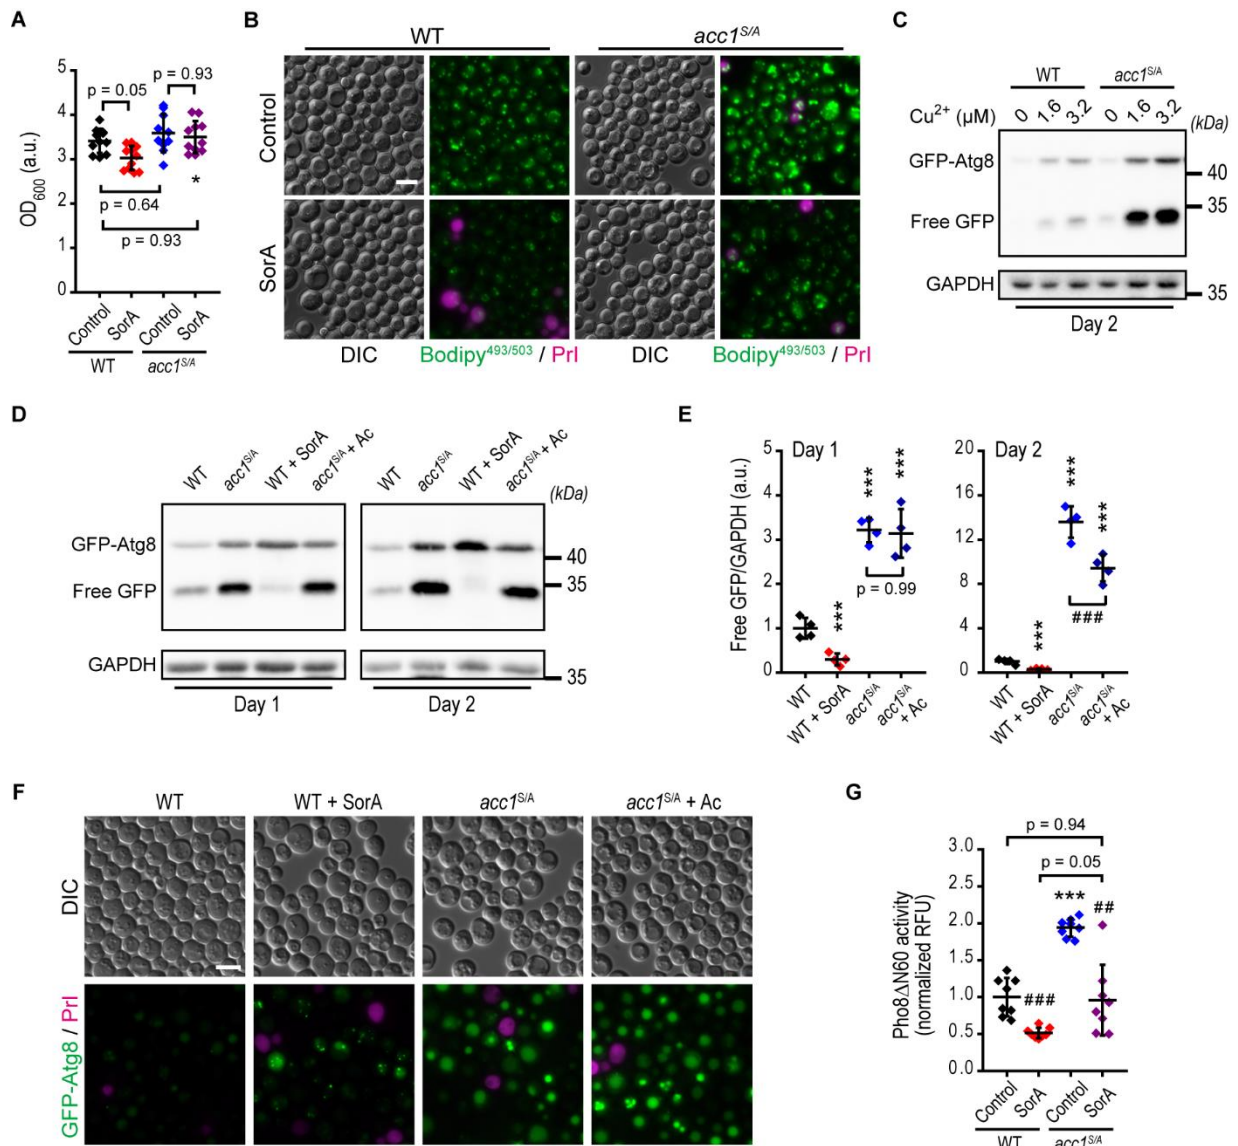

**Figure S1 (related to Figure 1)**

**Modulation of Acc1 activity correlates with alterations in autophagic flux.**

**(A)** Optical density (OD<sub>600</sub>) obtained using a Tecan™ GeniosPro plate reader of WT or *acc1<sup>S/A</sup>* mutant yeast cultures after 2 days of aging. (n = 10-11)

**(B)** Representative micrographs of Bodipy stained cells after 24 h (day 1) of incubation. Staining with propidium iodide (PrI) served to exclude dead cells. Bar represents 5 μm.

**(C)** Representative immunoblots of two-day-old WT or *acc1<sup>S/A</sup>* mutant yeast cells expressing GFP-Atg8 under the control of the Cu<sup>2+</sup>-inducible CUP1 promoter. Cells were treated with indicated concentrations of Cu<sub>2</sub>SO<sub>4</sub> 5 h after inoculation.

(Legend continued on next side...)

**(D, E)** Representative immunoblots (D) and densitometric quantification of free GFP/GAPDH levels (E) of GFP-Atg8-expressing WT or *acc1<sup>S/A</sup>* mutant yeast cells under the control of the Cu<sup>2+</sup>-inducible CUP1 promoter at indicated time points. Cells were treated with Soraphen A (SorA) 6 h after inoculation or with three consecutive additions of acetate (+ Ac) following day 1 according to Figure 3G.

**(F)** Representative micrographs of GFP-Atg8-expressing WT or *acc1<sup>S/A</sup>* mutant yeast cells under the control of the Cu<sup>2+</sup>-inducible CUP1 promoter after 48 h (day 2) of incubation according to panels D, E. Staining with propidium iodide (Prl) served to exclude dead cells from analysis. Bar represents 5  $\mu$ m.

**(G)** Vacuolar alkaline phosphatase (Pho8 $\Delta$ N60) activity indicative of autophagic flux at day 3 of aging of WT or *acc1<sup>S/A</sup>* mutant yeast cells treated with SorA 6 h after inoculation. Genetically engineered strains carrying Pho8 lacking its N-terminal transmembrane domain (Pho8 $\Delta$ N60) were used. (n = 8)

Dot plots show all data points along with the mean (line) +/- s.d.. ANOVA post-hoc *Tukey* in (A, E), Welch's ANOVA post-hoc *Games-Howell* in (G). \*p < 0.05, \*\*\*p < 0.001 (compared to the respective WT); ##p < 0.01, ###p < 0.001 (compared to the respective *Control* or as indicated)

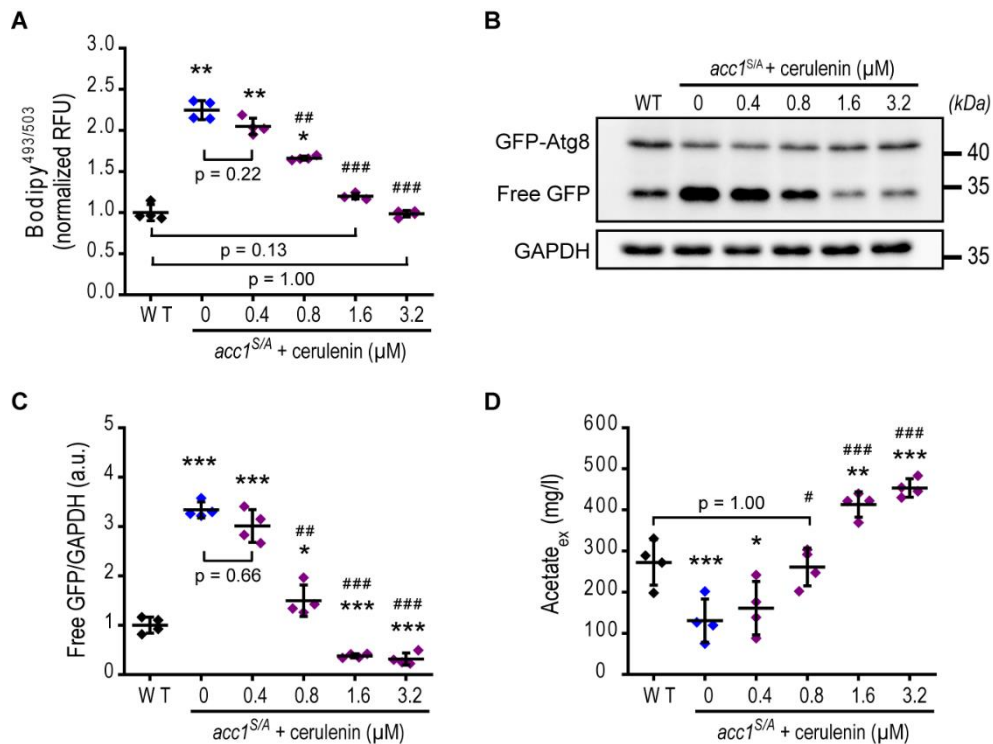

**Figure S2 (related to Figure 1 and 3)**

**FAS inhibition by cerulenin reverses the metabolic consequences and autophagy effects of the *acc1-S/A* mutation**

Wild-type (WT) or *acc1<sup>S/A</sup>* mutant yeast cells were aged on 2% glucose minimal media and treated with the indicated concentration of cerulenin or the solvent DMSO. (n = 4)

**(A)** Flow cytometric quantification of neutral lipids after Bodipy staining. (n = 4)

**(B, C)** Representative immunoblot (B) and densitometric quantification of free GFP/GAPDH signals (C) of GFP-Atg8-expressing cells after two days of aging. (n = 4)

**(D)** Enzymatic determination of extracellular acetate from culture supernatants. (n = 4)

Data were normalized to the WT in panels A, C. Dot plots show all data points along with the mean (line) +/- s.d.. ANOVA post-hoc Tukey in (C, D) and Welch's ANOVA post-hoc Games-Howell in (A). \*p < 0.05, \*\*p < 0.01, \*\*\*p < 0.001 (compared to the WT); #p < 0.05, ###p < 0.01, ####p < 0.001 (compared to the respective untreated control).

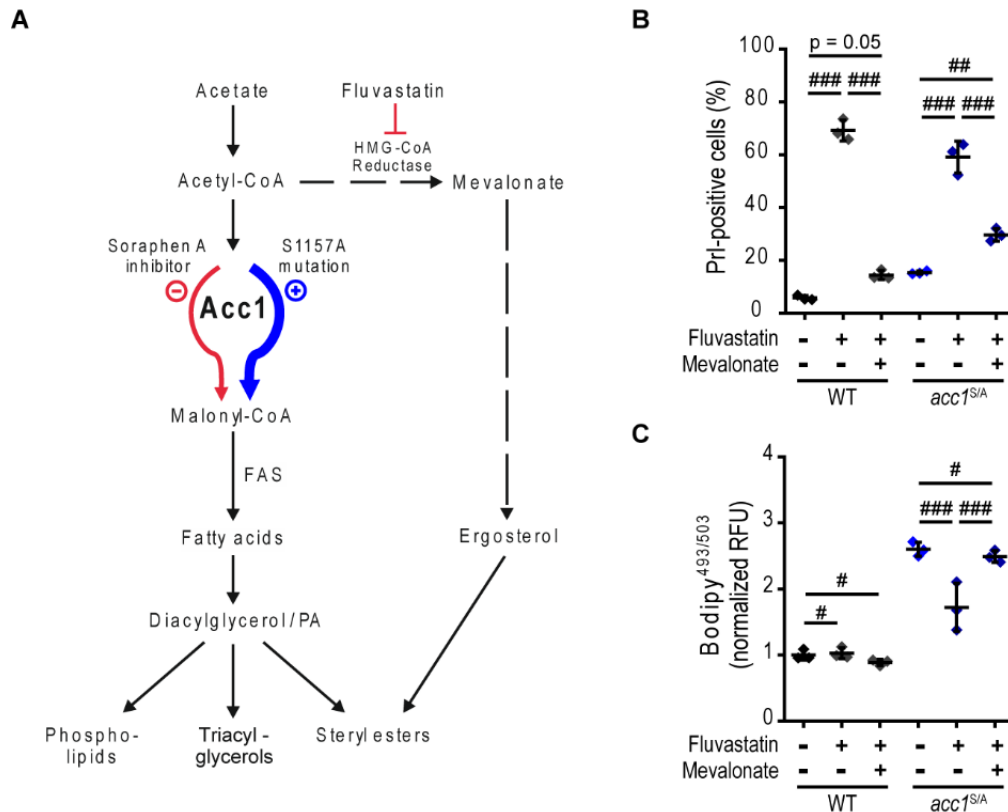

**Figure S3 (related to Figure 3)**

**Mevalonate supplementation prevents cell death upon fluvastatin treatment.**

Wild-type (WT) and *acc1<sup>S/A</sup>* mutant yeast cells were aged on 2% glucose minimal media and treated with 20  $\mu$ M fluvastatin with or without supplementation of 40 mg/mL mevalonate prior to inoculation.

**(A)** Scheme depicting the relation of the mevalonate pathway to the Acc1-regulated metabolic reaction. The mevalonate pathway is inhibited by fluvastatin, which blocks the rate-limiting HMG-CoA reductase activity. (PA, phosphatidic acid; FAS, fatty acid synthase; HMG-CoA, hydroxymethylglutaryl coenzyme A)

**(B)** Cell death assessed by flow cytometric quantification of propidium iodide (PrI) stained cells at day 2 of aging. (n = 3)

**(C)** Flow cytometric quantification of neutral lipids after Bodipy staining of cells at day 2 of incubation according to panel B. Relative fluorescence units were normalized to the WT control. (n = 3)

Dot plots show all data points along with the mean (line) +/- s.d.. ANOVA post-hoc *Tukey* in (B, C). #p < 0.05, ##p < 0.01, ###p < 0.001 (comparison as indicated)

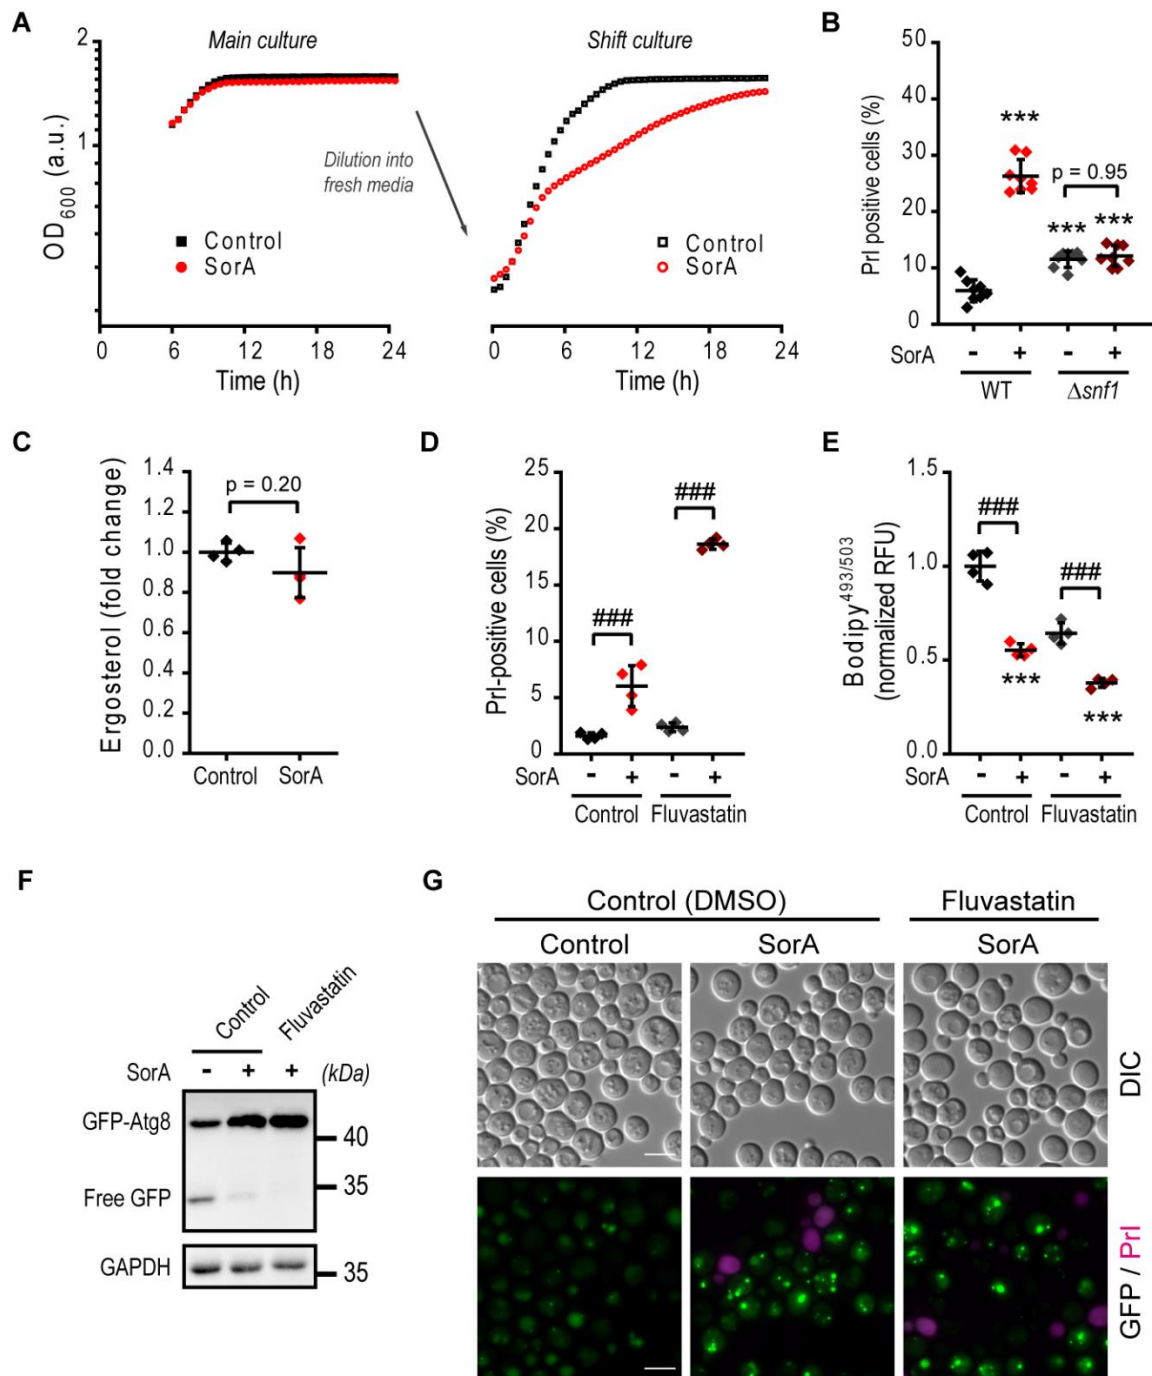

**Figure S4 (related to Figure 4)**

**Inhibition of autophagy by soraphen A does not require the mevalonate pathway.**

Wild-type (WT) or  $\Delta snf1$  yeast cells were aged on 2% glucose minimal media and treated with 0.5  $\mu\text{g/ml}$  soraphen A (SorA) or the solvent DMSO (Control) applied 6 h after inoculation.

**(A)** Growth curves determined by automated optical density (OD) measurements at 600 nm ( $\text{OD}_{600}$ ) using a Bioscreen C™ system.

(Legend continued on next side...)



WT cells from batch cultures according to (Figure 3A) were transferred to Bioscreen microplates 6 h after incubation directly after addition of SorA and residual growth was monitored (*Main culture*). After 25 h of incubation, WT cells from the same batch cultures were shifted into fresh medium of the same condition (with or without soraphen A according to their respective batch culture) and growth in Bioscreen microplates was monitored (*Shift culture*). Data show the means of 4 independent cultures.

**(B)** Cell death assessed by flow cytometric quantification of propidium iodide (PrI) stained cells after two days of aging. (n = 8)

**(C)** Relative ergosterol levels (normalized to *Control*) quantified from shotgun MS-based lipidomics of lipid cell extracts. (n = 4)

**(D, E)** Cell death assessed by flow cytometric quantification of propidium iodide (PrI) staining (D) and neutral lipid levels quantified after Bodipy staining (E) of cells treated with or without 20  $\mu$ M fluvastatin after 24 h of incubation. (n = 4)

**(F)** Representative immunoblots of GFP-Atg8 expressing cells according to panels D and E.

**(G)** Representative micrographs of one-day-old GFP-Atg8-expressing cells according to panels D-F. Staining with propidium iodide (PrI) served to exclude dead cells from analysis. Bars represent 5  $\mu$ m.

Dot plots show all data points along with the mean (line) +/- s.d.. ANOVA post-hoc *Tukey* in (B, D, E). Welch's *t*-test in C. \*\*\* $p < 0.001$  (compared to the WT control condition); ### $p < 0.001$  (comparison as indicated)

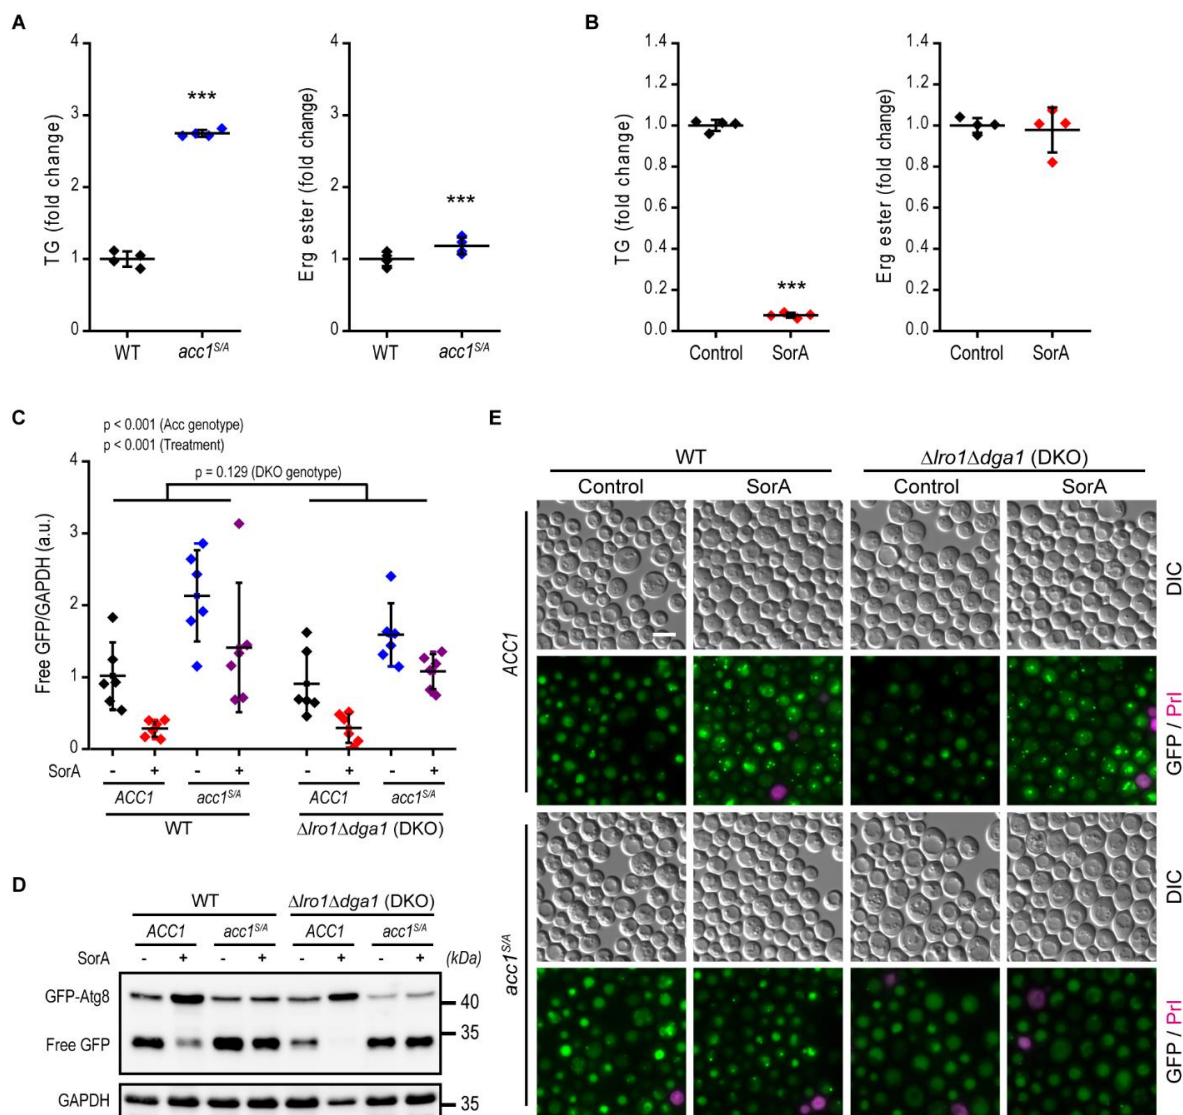

**Figure S5 (related to all Figures)**

**Modulation of Acc1 activity affects autophagy independent of changes in triglycerides.**

Wild-type (WT) or  $\Delta lro1\Delta dga1$  (DKO) combined with or without *acc1<sup>S/A</sup>* mutation were aged on 2% glucose minimal media and treated with 0.5  $\mu\text{g/ml}$  sorafen A (SorA) as indicated. *ACC1* denotes strains carrying wild-type *Acc1*. Data were obtained from two-day-old cells.

**(A, B)** Relative levels of triglycerides (TG, left panel) and ergosterol ester (Erg ester, right panel) as quantified from shotgun MS-based lipidomics of lipid cell extracts. Data were normalized to the WT in (A) and to control cells in (B). (n = 4)

(Legend continued on next side...)

**(C, D)** Representative immunoblots (D) and densitometric quantification of free GFP/GAPDH (C) of GFP-Atg8-expressing cells. (n = 8)

**(E)** Representative micrographs of GFP-Atg8-expressing cells. Staining with propidium iodide (PrI) served to exclude dead cells from analysis. Bar represents 5  $\mu$ m.

Dot plots show all data points along with the mean (line)  $\pm$  s.d.. Welch's *t*-test in A, B. *P*-values in (C) indicate the main effects of a three-way ANOVA (*Note: None of the interactions determined within the three-way ANOVA were significant at the p-level of 0.05*). \*\*\* $p < 0.001$

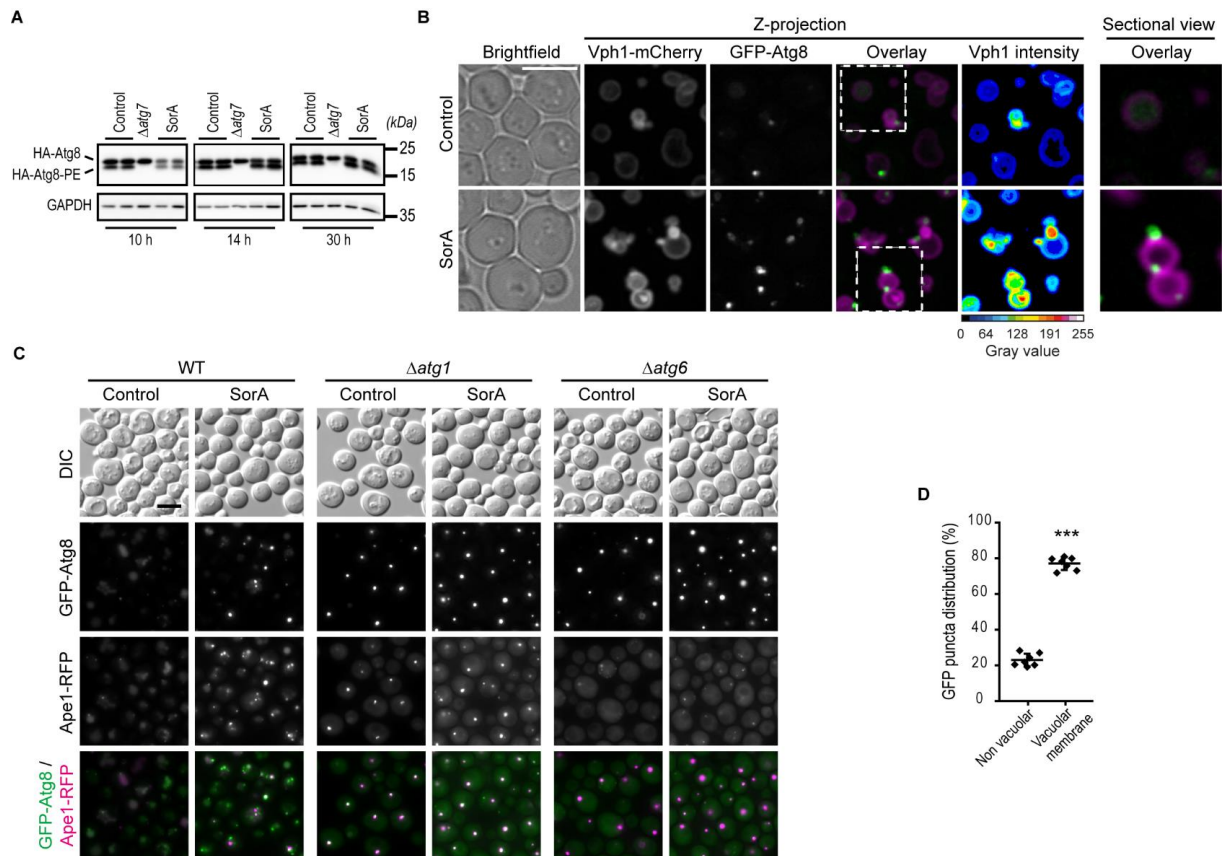

**Figure S6 (related to Figure 6)**

### Acc1 inhibition by soraphen A does not impair the lipidation or PAS-localization of Atg8

**(A)** Immunoblot analysis of 3xHA-Atg8 expressing  $\Delta pep4$  cells treated with or without soraphen A (SorA) 6 h after inoculation and incubated until the indicated time points. Blots were probed with HA and GAPDH (loading control) recognizing antibodies. 3xHA-Atg8 expressing  $\Delta atg7$  cells served as a negative control lacking the lipidated (HA-Atg8-PE) form of Atg8.

**(B)** Confocal micrographs of Vph1-mCherry and GFP-Atg8 expressing wild-type cells treated with or without soraphen A (SorA). Z-projection (maximum projection) along with the brightfield image and a selected sectional view (magnification of dashed lined area) is shown. Scale bar represents 5  $\mu$ m.

**(C)** Representative micrographs of two-day-old wild-type (WT),  $\Delta atg1$  and  $\Delta atg6$  cells expressing GFP-Atg8 and Ape1-RFP fusions as a marker of the pre-autophagosomal structure (PAS) site. Cultures were treated with soraphen A (SorA) 6 h after inoculation as indicated. Bar represents 5  $\mu$ m.

**(D)** Relative distribution of Vph1-mCherry (vacuolar membrane) localized versus non-vacuolar GFP-Atg8 puncta obtained from automated puncta analysis of micrographs representatively shown in Fig. 6B. (n = 8); \*\*\*p < 0.001 (Welch's t-test)

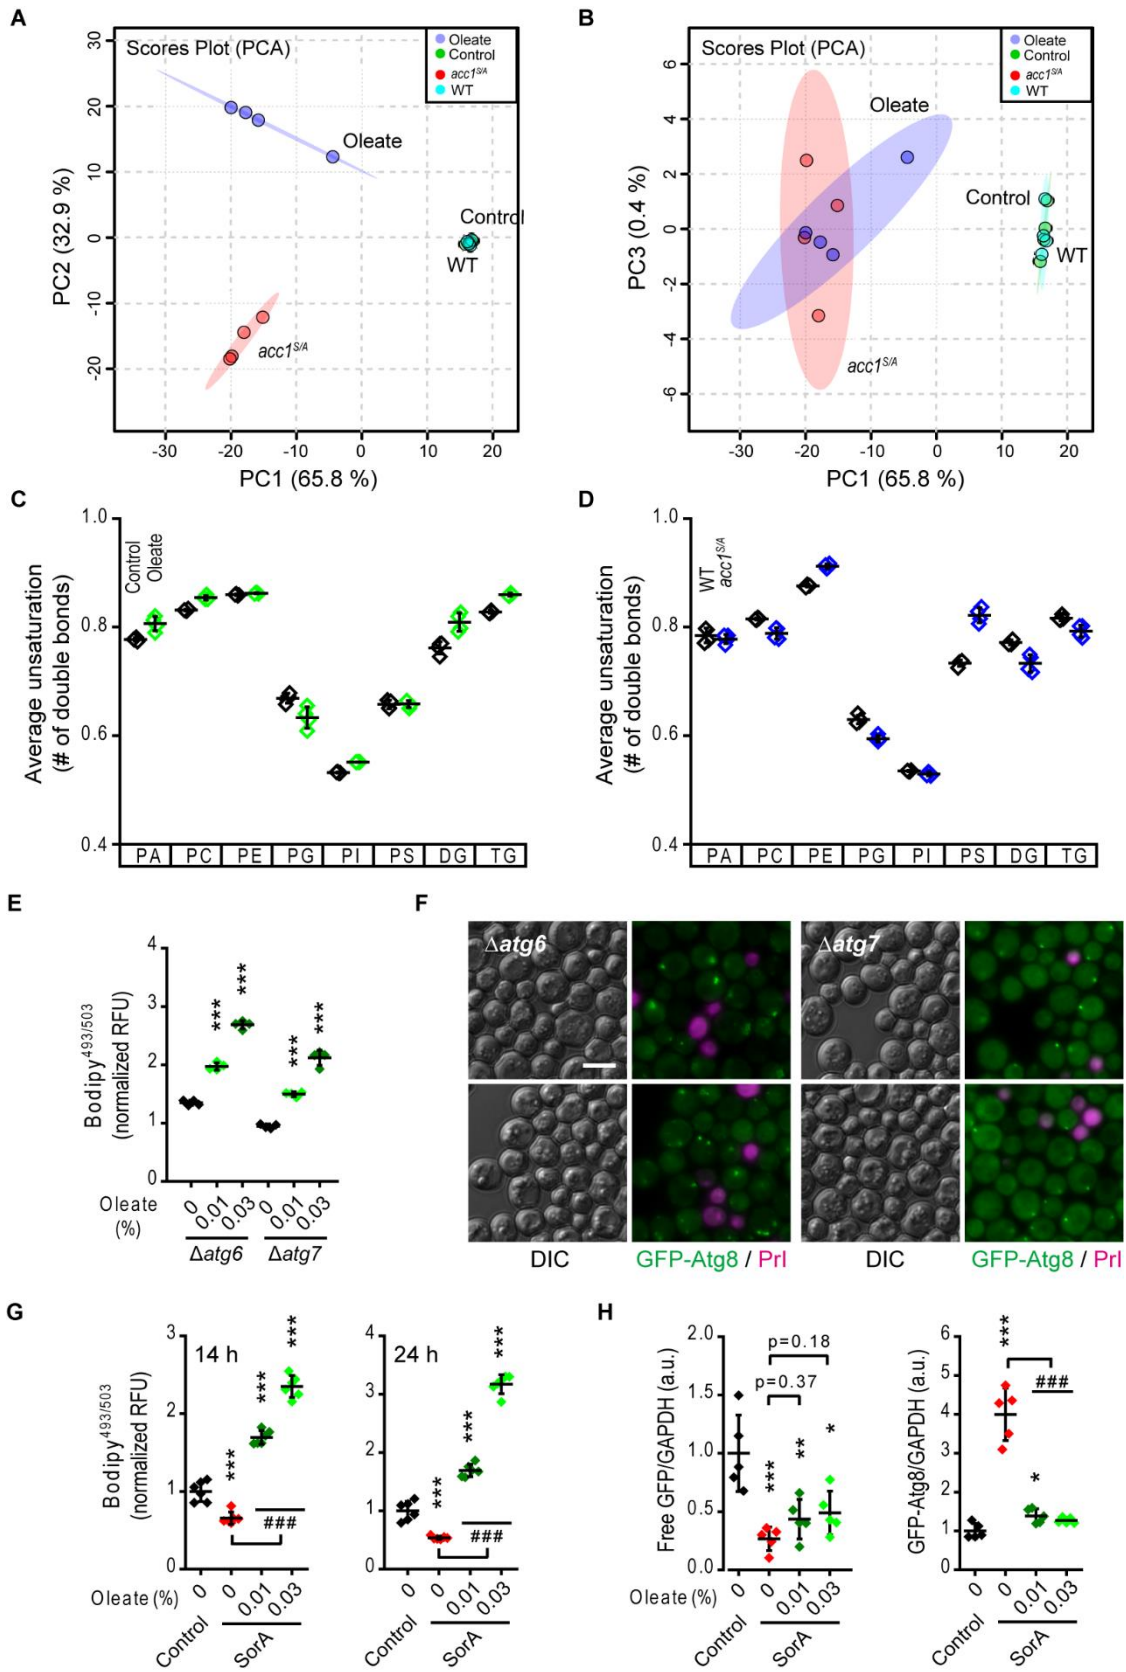

Figure S7 (related to Figure 7) - (Legend on next side...)

## Supplementation of oleic acid partly mimics the lipidomic adaptations of the *acc1-S/A* mutation

**(A, B)** Principal component analysis (PCA) of lipid profiles assessed by shotgun mass spectrometry of 2-day-old yeast. The lipid profiles of wild-type (WT) and *acc1<sup>S/A</sup>* mutant cells are compared to that of WT control cells in the presence of the solvent Tergitol (*Control*) and cells supplemented with 0.03% (w/v) oleate (*Oleate*). Each experimental set was normalized to the mean of its respective control (WT or Control condition) preceding PCA analysis. Ellipsoids show 95% confidence intervals.

**(C, D)** Average degree of unsaturation of different classes of glycerolipids (as indicated) were calculated from the lipidomic profiles according to (A, B). Panel (C) shows the effects of 0.03% (w/v) oleate treatment (*Oleate*) and (D) of the *acc1-S1157A* mutation (*acc1<sup>S/A</sup>*) compared to the respective untreated (*Control*) or wild-type (*WT*) controls, respectively. (n = 4)

**(E)** Flow cytometric quantification of neutral lipids after Bodipy staining of two-day-old GFP-Atg8-expressing  $\Delta atg6$  or  $\Delta atg7$  cells supplemented with 0.03% (w/v) oleate or the solvent Tergitol (*Control*). Relative fluorescence units (RFU) were normalized to the WT control. (n = 4)

**(F)** Representative micrographs of two-day-old GFP-Atg8-expressing  $\Delta atg6$  or  $\Delta atg7$  cells supplemented with 0.03% (w/v) oleate or the solvent Tergitol (*Control*). Bar represents 5  $\mu$ m.

**(G)** Flow cytometric quantification of neutral lipids after Bodipy staining at indicated time points of SorA treated WT cells with or without supplementation of 0.01% or 0.03% oleate.

**(H)** Levels of free GFP/GAPDH (left panel) and full length GFP-Atg8/GAPDH (right panel) of immunoblots from GFP-Atg8-expressing cells after 14 h of incubation according to Figure 7H. (n = 5)

Dot plots show all data points along with the mean (line) +/- sd. ANOVA post-hoc *Tukey* in (E, G, H). \*p < 0.05, \*\*p < 0.01, \*\*\*p < 0.001 (compared to the respective untreated control in E, compared to *Control* in G, H); ####p < 0.001 (comparison as indicated). *PA*, phosphatidic acids; *PC*, phosphatidylcholines; *PE*, phosphatidylethanolamines; *PG*, phosphatidylglycerols; *PI*, phosphatidylinositols; *PS*, phosphatidylserines; *DG*, diglycerides; *TG*, triglycerides
